# Supplementary material for: Enhanced anti-Escherichia coliproperties of Fe-doping in MgO nanoparticles
Source: Royal Society of Chemistry journal article supplement (doi:10.1039/d0ra09590g), 2021-01-01
Supplement: d0ra09590g1.pdf [file d0ra09590g1.pdf]

## Supporting Information

### **Enhanced Anti-*Escherichia coli* Properties of Fe-Doping in MgO Nanoparticles**

Xiaoyu Hong, Yan Yang,\* Xiaoyi Li, Maurice Abitonze, Catherine Sekyerebea Diko,  
Jiao Zhao,\* Qiao Ma, Weifeng Liu, Yimin Zhu\*

Collaborative Innovation Center for Vessel Pollution Monitoring and Control, Dalian  
Maritime University, Dalian 116026, China

Corresponding authors E-mail address: [yyang@dlnu.edu.cn](mailto:yyang@dlnu.edu.cn); [zhaojiao@dlnu.edu.cn](mailto:zhaojiao@dlnu.edu.cn);  
[ntp@dlnu.edu.cn](mailto:ntp@dlnu.edu.cn).

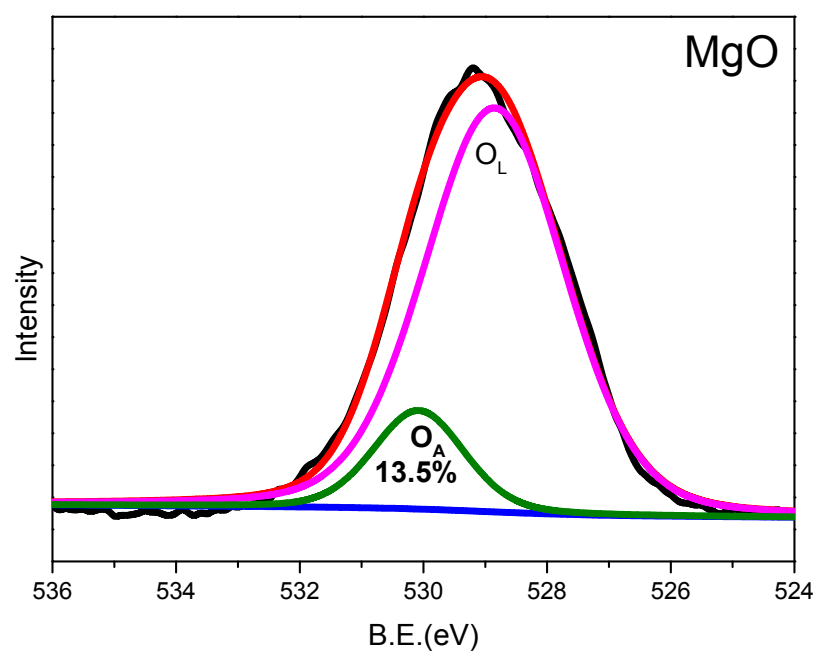

**Figure S1.** The O 1s XPS spectrum of MgO NPs.

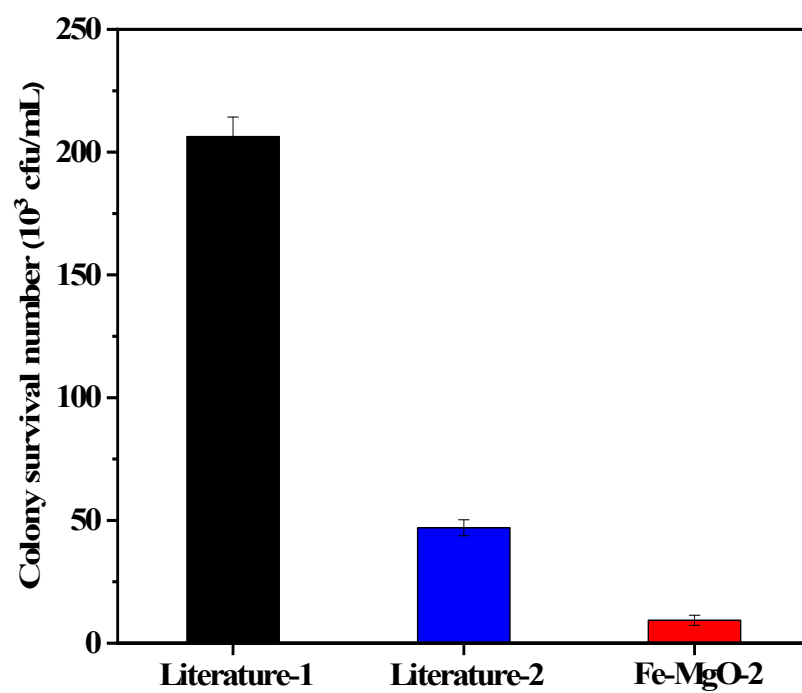

**Figure S2.** The antibacterial activity comparison between Fe-MgO-1 and literature reported MgO materials (ChemistrySelect., 2020, 5, 3201-3207, MgO-450 and MgO-650 for Literature-1 and Literature-2, respectively).
